# Supplementary material
Source: Elsevier journal article supplement (https://comptes-rendus.academie-sciences.fr/biologies/article/10.1016/j.crvi.2012.11.005/file/attach/mmc2.pdf)
Supplement: mmc2 [file mmc2.pdf]

**Appendice électronique 2 : Aperçu du tableau synthétique d'aide à la prospection.** Les légendes des variables sont explicitées dans le tableau 2. Une première partie des variables (description générale) donne les caractéristiques générales de l'inventaire de chaque maille et notamment le taux d'exhaustivité de l'inventaire estimé à partir du Jackknife 1. Le ND signifie « Non Disponible » car la maille présente moins de 250 données et le Jackknife 1 n'a donc pas été calculé. Les autres variables donnent des indications pour orienter les prospections au niveau géographique (où), au niveau temporel (quand) et sur les espèces à cibler (quelles espèces). Les cellules en noir correspondent pour chaque variable au tercile des valeurs les plus hautes ; les cellules grisées au tercile médian et les cellules blanches au tercile des valeurs les plus faibles. Les mailles sont ordonnées selon l'ordre croissant du taux d'exhaustivité estimé par le Jackknife 1.

| NOM MAILLE | DESCRIPTION GENERALE          |                   |                   | OU ?                       |                                  |                                                      |                     |                                    |                                        |                                      |                                     | QUAND ?                           |                               |                             |                        |                   |              |                             | QUELLES ESPECES ?    |                            |                                |
|------------|-------------------------------|-------------------|-------------------|----------------------------|----------------------------------|------------------------------------------------------|---------------------|------------------------------------|----------------------------------------|--------------------------------------|-------------------------------------|-----------------------------------|-------------------------------|-----------------------------|------------------------|-------------------|--------------|-----------------------------|----------------------|----------------------------|--------------------------------|
|            | Taux exhaustivité Jackknife 1 | Richesse observée | Nombre de données | % mailles 1km² avec relevé | Nb data CC2 : milieux aquatiques | Nb data CC3 : landes, fruticités, pelouses, prairies | Nb data CC4 : forêt | Nb data CC5 : tourbières et marais | Nb data CC6 : rochers, éboulis, sables | Nb data CC8 : agricole et artificiel | Nb data printemps1 : 1er mars-15mai | Nb data printemps2 : 16mai-30juin | Nb data été : 1juillet-31août | Nb data autre : 1sept-31oct | Nb data Biblio (>2000) | Nb Data 2000-2005 | Nb data>2005 | % années visitées post 2000 | Nb Espèces rares tot | Nb Espèces rares post 2000 | % Espèces ubiquistes post 2000 |
| E0490N6775 | ND                            | 110               | 212               | 12%                        | 0                                | 0                                                    | 0                   | 0                                  | 0                                      | 199                                  | 0                                   | 133                               | 75                            | 4                           | 728                    | 195               | 17           | 25%                         | 4                    | 0                          | 45%                            |
| E0495N6755 | 52%                           | 127               | 263               | 18%                        | 4                                | 0                                                    | 31                  | 31                                 | 0                                      | 184                                  | 0                                   | 1                                 | 259                           | 0                           | 399                    | 3                 | 260          | 17%                         | 5                    | 0                          | 39%                            |
| E0520N6745 | 56%                           | 255               | 318               | 16%                        | 8                                | 0                                                    | 75                  | 55                                 | 0                                      | 141                                  | 92                                  | 33                                | 193                           | 0                           | 595                    | 233               | 85           | 25%                         | 9                    | 1                          | 80%                            |
| E0465N6740 | 58%                           | 191               | 400               | 20%                        | 0                                | 0                                                    | 69                  | 0                                  | 0                                      | 288                                  | 0                                   | 111                               | 0                             | 289                         | 201                    | 358               | 42           | 25%                         | 1                    | 1                          | 68%                            |
| E0530N6780 | 59%                           | 193               | 286               | 24%                        | 20                               | 95                                                   | 51                  | 11                                 | 0                                      | 54                                   | 98                                  | 53                                | 22                            | 113                         | 335                    | 221               | 65           | 58%                         | 5                    | 3                          | 61%                            |
| E0475N6765 | 60%                           | 259               | 571               | 16%                        | 0                                | 0                                                    | 106                 | 0                                  | 0                                      | 253                                  | 25                                  | 0                                 | 256                           | 290                         | 270                    | 303               | 268          | 33%                         | 3                    | 1                          | 79%                            |
| E0475N6775 | 63%                           | 253               | 390               | 14%                        | 0                                | 0                                                    | 0                   | 0                                  | 0                                      | 222                                  | 246                                 | 94                                | 50                            | 0                           | 1141                   | 340               | 50           | 33%                         | 6                    | 1                          | 80%                            |
| E0490N6810 | 63%                           | 236               | 406               | 45%                        | 33                               | 35                                                   | 19                  | 0                                  | 0                                      | 36                                   | 56                                  | 108                               | 140                           | 14                          | 342                    | 199               | 207          | 75%                         | 11                   | 4                          | 60%                            |
| E0505N6730 | 64%                           | 310               | 663               | 35%                        | 9                                | 36                                                   | 0                   | 38                                 | 0                                      | 350                                  | 6                                   | 343                               | 239                           | 69                          | 243                    | 662               | 1            | 42%                         | 4                    | 3                          | 73%                            |
| E0495N6735 | 64%                           | 333               | 1091              | 29%                        | 173                              | 38                                                   | 189                 | 0                                  | 0                                      | 669                                  | 233                                 | 185                               | 673                           | 0                           | 175                    | 421               | 670          | 42%                         | 6                    | 4                          | 88%                            |
| E0465N6750 | 65%                           | 405               | 832               | 31%                        | 5                                | 99                                                   | 52                  | 236                                | 0                                      | 247                                  | 152                                 | 71                                | 78                            | 522                         | 406                    | 800               | 32           | 67%                         | 15                   | 8                          | 89%                            |
| E0460N6775 | 65%                           | 281               | 514               | 24%                        | 15                               | 0                                                    | 62                  | 0                                  | 11                                     | 80                                   | 116                                 | 56                                | 142                           | 166                         | 1790                   | 329               | 185          | 83%                         | 24                   | 7                          | 68%                            |
| E0480N6795 | 65%                           | 233               | 388               | 24%                        | 0                                | 0                                                    | 0                   | 0                                  | 0                                      | 0                                    | 49                                  | 30                                | 195                           | 114                         | 624                    | 312               | 76           | 33%                         | 4                    | 2                          | 66%                            |
| E0485N6800 | 67%                           | 304               | 704               | 27%                        | 0                                | 0                                                    | 24                  | 0                                  | 0                                      | 471                                  | 26                                  | 407                               | 68                            | 131                         | 144                    | 604               | 100          | 58%                         | 6                    | 5                          | 89%                            |
| E0500N6760 | 67%                           | 369               | 956               | 31%                        | 7                                | 366                                                  | 202                 | 77                                 | 0                                      | 200                                  | 259                                 | 179                               | 511                           | 2                           | 471                    | 257               | 699          | 83%                         | 35                   | 8                          | 78%                            |
| E0475N6780 | 67%                           | 228               | 518               | 24%                        | 0                                | 46                                                   | 0                   | 0                                  | 0                                      | 350                                  | 56                                  | 420                               | 22                            | 18                          | 585                    | 443               | 75           | 67%                         | 9                    | 1                          | 69%                            |
| E0500N6815 | 67%                           | 336               | 924               | 45%                        | 59                               | 136                                                  | 101                 | 38                                 | 0                                      | 363                                  | 281                                 | 383                               | 56                            | 59                          | 1484                   | 767               | 157          | 58%                         | 10                   | 3                          | 72%                            |
| E0465N6760 | 70%                           | 357               | 997               | 31%                        | 49                               | 0                                                    | 115                 | 9                                  | 0                                      | 581                                  | 92                                  | 60                                | 714                           | 131                         | 494                    | 903               | 94           | 50%                         | 4                    | 2                          | 96%                            |
| E0470N6790 | 70%                           | 377               | 852               | 53%                        | 14                               | 111                                                  | 38                  | 18                                 | 0                                      | 237                                  | 320                                 | 98                                | 292                           | 114                         | 1101                   | 617               | 235          | 75%                         | 20                   | 8                          | 72%                            |
| E0505N6790 | 71%                           | 328               | 1008              | 37%                        | 104                              | 50                                                   | 164                 | 61                                 | 0                                      | 549                                  | 40                                  | 1                                 | 6                             | 961                         | 264                    | 418               | 590          | 25%                         | 1                    | 1                          | 96%                            |
| E0495N6800 | 75%                           | 356               | 1230              | 35%                        | 46                               | 135                                                  | 76                  | 68                                 | 0                                      | 820                                  | 66                                  | 124                               | 445                           | 592                         | 198                    | 915               | 315          | 33%                         | 2                    | 1                          | 99%                            |
| E0505N6795 | 77%                           | 367               | 1728              | 35%                        | 433                              | 41                                                   | 176                 | 156                                | 0                                      | 833                                  | 232                                 | 229                               | 638                           | 614                         | 385                    | 969               | 759          | 50%                         | 1                    | 0                          | 96%                            |
| E0475N6740 | 81%                           | 515               | 4994              | 49%                        | 362                              | 1091                                                 | 1067                | 49                                 | 0                                      | 2164                                 | 805                                 | 2335                              | 871                           | 854                         | 1772                   | 2347              | 2647         | 75%                         | 27                   | 7                          | 99%                            |
